# Supplementary material
Source: Research Square preprint supplement (doi:10.21203/rs.3.rs-9208763/v1)

**Figure 1.** The result of maximum femoral von Mises stress(MFVMS).(A) Under axial loading. (B) Under torsional loading.


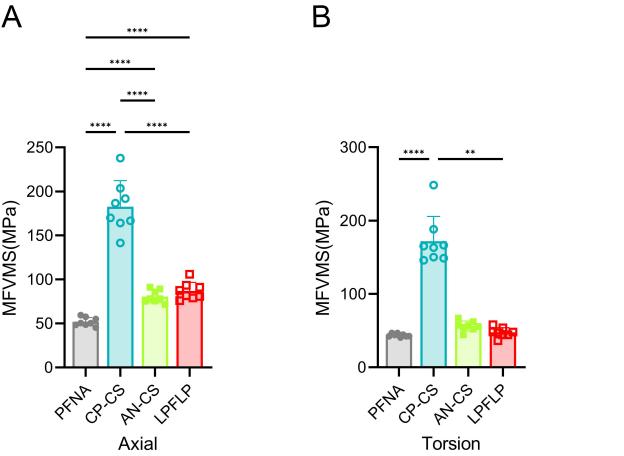


**Figure 2.** The result of maximum Implant von Mises stress(MIVMS).(A) Under axial loading. (B) Under torsional loading.


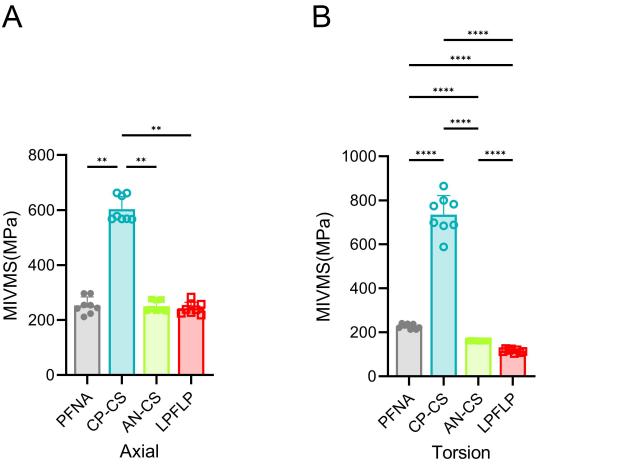


**Figure 3.** The result of maximum proximal femoral von Mises stress(MPFVMS).(A) Under axial loading. (B) Under torsional loading.


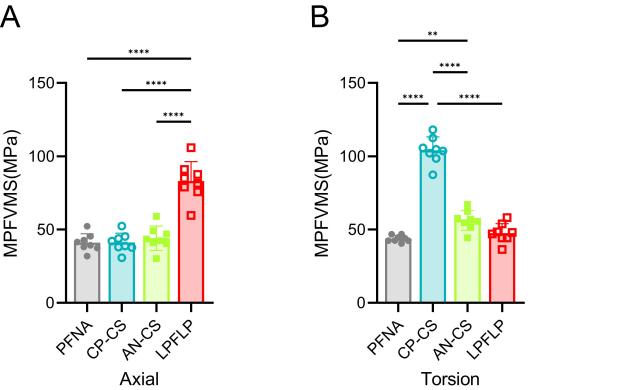


**Figure 4.** The result of maximum femoral displacement(MFD).(A) Under axial loading. (B) Under torsional loading.


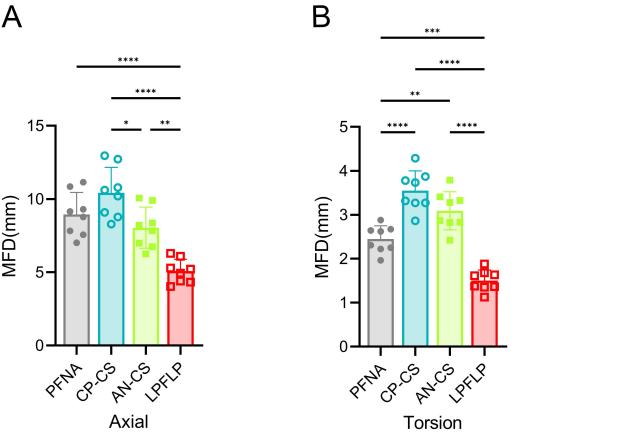


**Figure 5.** The result of maximum Implant displacement(MID).(A) Under axial loading. (B) Under torsional loading.


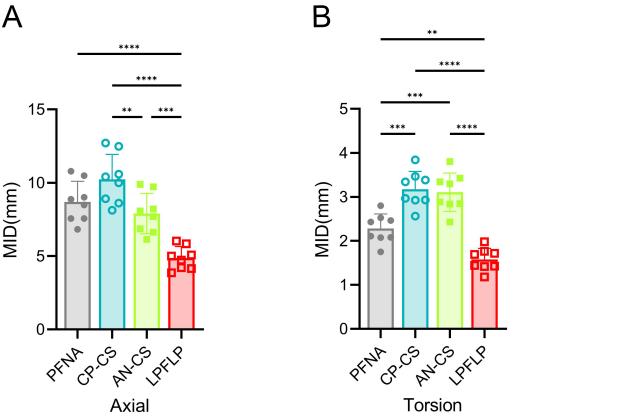


**Figure 6.** The result of maximum femoral head and neck interfragmentary motion

(MFHNIM).(A) Under axial loading. (B) Under torsional loading.


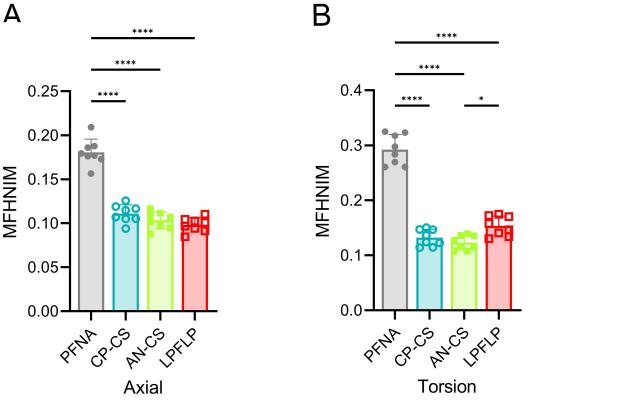

Supplement: Supplementary file 1 [file 47c622486243f0a18bd5c2b1.docx]
